# Supplementary material for: ZBED1 Regulates Genes Important for Multiple Biological Processes of the Placenta
Source: MDPI journal article supplement (doi:10.3390/genes13010133), 2022-01-12
Supplement: s1 [file s1]

### ZBED1 knockdown

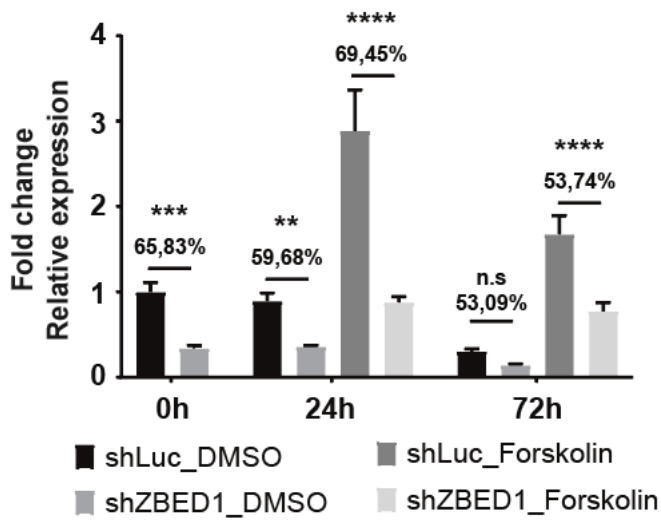

**Figure S1. Validation of *ZBED1* knockdown in BeWo cells.** BeWo cells were transduced with *ZBED1*-specific shRNA (shZBED1) or luciferase-specific shRNA (shLuc; negative control) and treated with forskolin or DMSO (control). Knockdown of *ZBED1* was validate by qPCR. The data is presented as mean  $\pm$  SEM. Two-way ANOVA with following multiple comparison test of the mean values of the individual timepoints were used to calculate significance (n=3). ns = non-significant.

\*\*\*\*  $P < 0.00001$ ; \*\*\*  $P < 0.0001$ ; \*\*  $P < 0.001$ .
