# Supplementary material for: ZBED1 Regulates Genes Important for Multiple Biological Processes of the Placenta
Source: MDPI journal article supplement (doi:10.3390/genes13010133), 2022-01-12
Supplement: s1 [file s1]

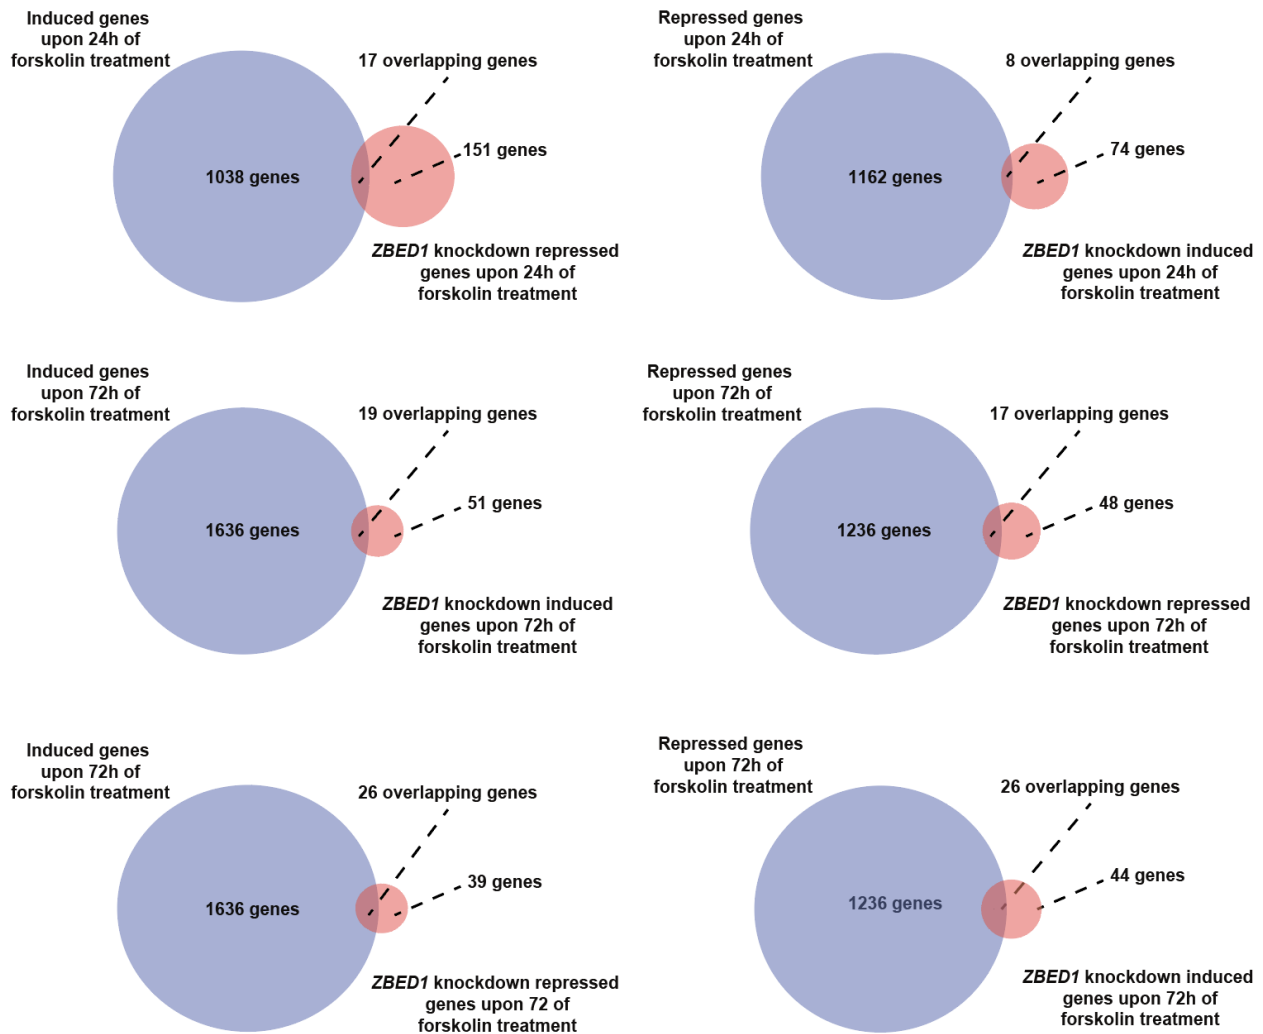

**Figure S2. ZBED1 regulates crucial genes of biological processes related to BeWo**

**differentiation.** Overlap of genes regulated by forskolin treatment (purple) and ZBED1 knockdown during forskolin treatment (pink) (RNA-seq data).
